# Supplementary material for: A new look at an old concept: using 15 N 2 O isotopomers to understand the relationship between soil moisture and N 2 O production pathways
Source: Copernicus journal article supplement (doi:10.5194/soil-5-265-2019), 2019-09-19
Supplement: Supplementary file 1 [file soil-5-265-2019-supplement.pdf]

Supplement of SOIL, 5, 265–274, 2019  
<https://doi.org/10.5194/soil-5-265-2019-supplement>  
© Author(s) 2019. This work is distributed under  
the Creative Commons Attribution 4.0 License.

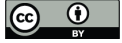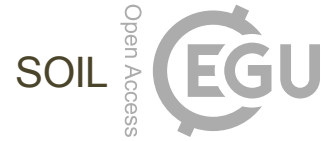

*Supplement of*

**A new look at an old concept: using  $^{15}\text{N}_2\text{O}$  isotopomers to understand the relationship between soil moisture and  $\text{N}_2\text{O}$  production pathways**

**Katelyn A. Congreves et al.**

*Correspondence to:* Kate A. Congreves ([kate.congreves@usask.ca](mailto:kate.congreves@usask.ca))

The copyright of individual parts of the supplement might differ from the CC BY 4.0 License.

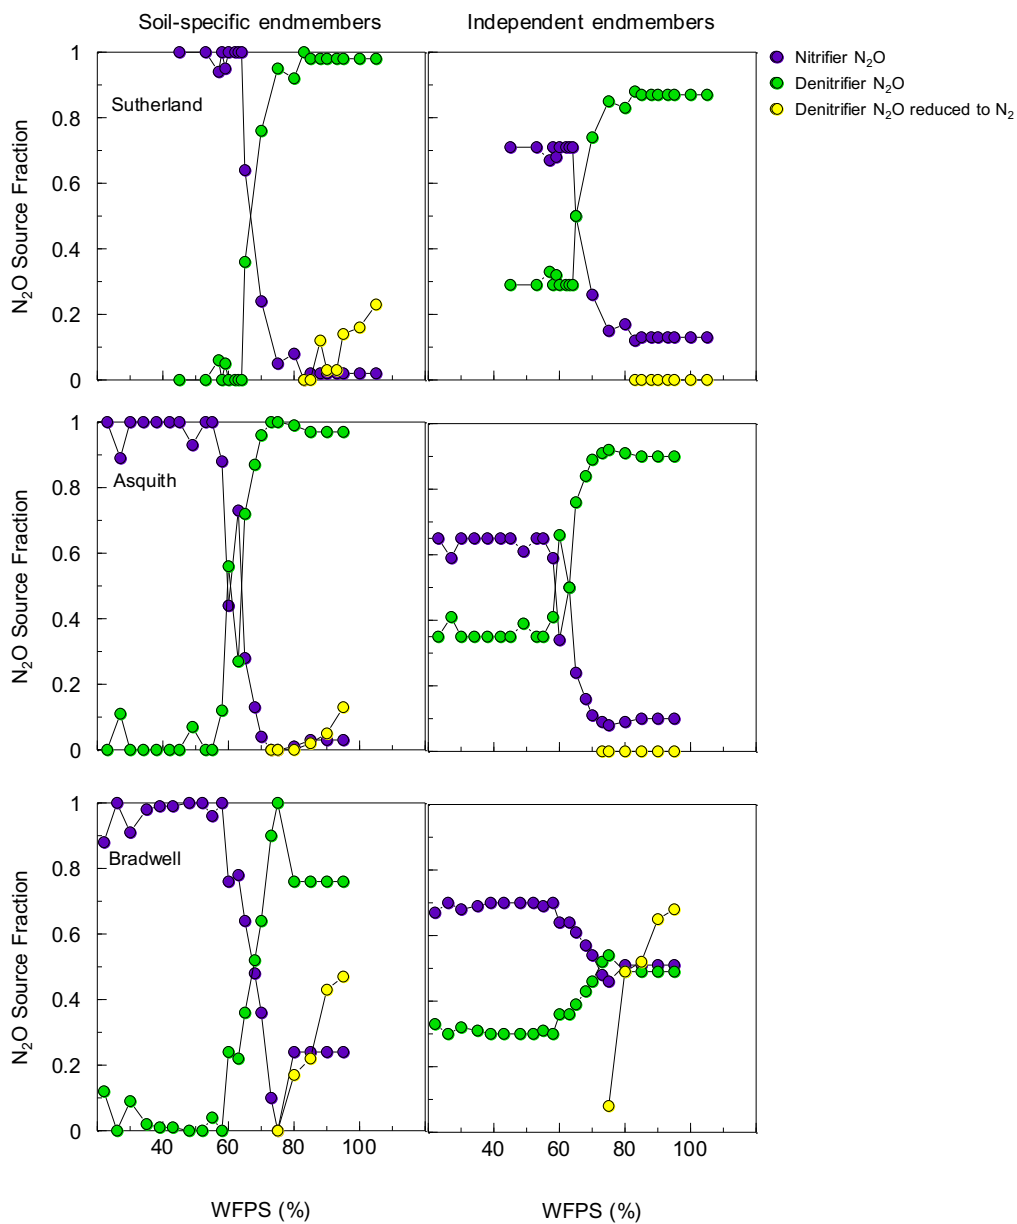

**Figure S1 Fraction of emitted N<sub>2</sub>O that was attributed to nitrification and denitrification based on the soil-specific endmember/slope approach (left panels) and the independent literature-derived endmember/slope approach (right panels).**
